# Supplementary material
Source: ML conference proceedings conference paper supplement (https://aclanthology.org/D19-1386)
Supplement: Attachment [file D19-1386.Attachment.zip]

## **A Additional WikiCite Examples**

Here we include example instances from WIKICITE dataset in Figures 1, 2, and 3.

|                                                                                                                                                                                                                                                                                                                                                                                                                                                                                                                                                                                                                                                                                                                                                                                                                                                                                                                                                                                                                                                                                                                                                                                                                                                                                                                                                                                                                                                                                                                                                                                                                                                                                                                                                                                                                                                                                                                                                                                                                                                                                                                                                                                                                                                                                                                                                                                                                                                                                                                                                                                                                                                                                                                                                                                                                                                                                                                                                                                                                                                                                                                                                                                                                           |                                                                                                                                                             |
|---------------------------------------------------------------------------------------------------------------------------------------------------------------------------------------------------------------------------------------------------------------------------------------------------------------------------------------------------------------------------------------------------------------------------------------------------------------------------------------------------------------------------------------------------------------------------------------------------------------------------------------------------------------------------------------------------------------------------------------------------------------------------------------------------------------------------------------------------------------------------------------------------------------------------------------------------------------------------------------------------------------------------------------------------------------------------------------------------------------------------------------------------------------------------------------------------------------------------------------------------------------------------------------------------------------------------------------------------------------------------------------------------------------------------------------------------------------------------------------------------------------------------------------------------------------------------------------------------------------------------------------------------------------------------------------------------------------------------------------------------------------------------------------------------------------------------------------------------------------------------------------------------------------------------------------------------------------------------------------------------------------------------------------------------------------------------------------------------------------------------------------------------------------------------------------------------------------------------------------------------------------------------------------------------------------------------------------------------------------------------------------------------------------------------------------------------------------------------------------------------------------------------------------------------------------------------------------------------------------------------------------------------------------------------------------------------------------------------------------------------------------------------------------------------------------------------------------------------------------------------------------------------------------------------------------------------------------------------------------------------------------------------------------------------------------------------------------------------------------------------------------------------------------------------------------------------------------------------|-------------------------------------------------------------------------------------------------------------------------------------------------------------|
| Cypress Grove (musician), Biography                                                                                                                                                                                                                                                                                                                                                                                                                                                                                                                                                                                                                                                                                                                                                                                                                                                                                                                                                                                                                                                                                                                                                                                                                                                                                                                                                                                                                                                                                                                                                                                                                                                                                                                                                                                                                                                                                                                                                                                                                                                                                                                                                                                                                                                                                                                                                                                                                                                                                                                                                                                                                                                                                                                                                                                                                                                                                                                                                                                                                                                                                                                                                                                       |                                                                                                                                                             |
| <p>Cypress Grove was born in London into a musical family. <b>His father was a professional jazz drummer</b> who at one time played with The Chris Barber band. In the late-1950s and early-1960s, Chris Barber was mainly responsible for arranging the first UK tours of seminal blues artists such as Big Bill Broonzy, Sonny Terry &amp; Brownie McGhee and Muddy Waters. <b>Cypress was taught by his father to play drums at an early age. But by the time he turned 16, his interest had switched to guitar.</b></p> <p>His infatuation with pre-war acoustic blues continued to develop, which led to a chance encounter with Jeffrey Lee Pierce from The Gun Club. Jeffrey had a real passion for roots music of any kind, so the two hit it off immediately. Jeffrey and Cypress started to regularly jam together on acoustic guitars in Cypress' bedroom. Jeffrey eventually invited Cypress to collaborate with him on his long planned album of roots material - an album Jeffrey had been putting off for many years, as he could not find the right person to do it with - until he met Cypress. The album was released in 1992 - "Ramblin' Jeffrey Lee and Cypress Grove with Willie Love". Jeffrey and Cypress went on to tour the album on a handful of occasions, both with a band and as an acoustic duo.</p> <p>October 1994. Jeffrey and Cypress are filmed for Henri-Jean Debon's "Hard Times Killin' Floor Blues" film- featuring Nick Cave. The film was eventually released in 2008.</p> <p>Jeffrey and Cypress started to rehearse material for a follow up album. Jeffrey invited Cypress to join The Gun Club. Both events were destined not to happen. In mid 1995 Jeffrey returned to the States. Cypress takes him to the airport. It is the last time they will ever see each other. Jeffrey died in March 1996.</p> <p>After Jeffrey's death, Cypress moved to France for some years. Traveling the entire country, playing various gigs, festivals and radio sessions.</p> <p>In 2006, having returned to London, Cypress discovered a tape of Jeffrey and himself rehearsing some songs that Jeffrey had written. ", These were plainly works in progress, and while the quality was deemed too poor for release, Cypress started to record the songs properly and invited a number of musicians to help him complete them, including Nick Cave, Iggy Pop, Thurston Moore, Debbie Harry, Chris Stein, Warren Ellis, Jim Sclavunos, Mark Lanegan, Isobel Campbell, Primal Scream, Mark Stewart and Lydia Lunch to name but a few. This series of collaborations became known as The Jeffrey Lee Pierce Sessions Project and resulted in what will eventually be a sequence of four albums - volume three will be released in May 2014. Isobel Campbell was so delighted with her duet with Mark Lanegan on volume one that she added the song to her live set, and invited Cypress to perform it live on stage with her and Mark at her London shows in 2008/9. It was around this time that Cypress and Lydia Lunch decided to expand on their highly successful pairing during the JLP sessions and started recording what would eventually become "A Fistful Of Desert Blues".</p> |                                                                                                                                                             |
| Cypress Grove was born into a musical family.                                                                                                                                                                                                                                                                                                                                                                                                                                                                                                                                                                                                                                                                                                                                                                                                                                                                                                                                                                                                                                                                                                                                                                                                                                                                                                                                                                                                                                                                                                                                                                                                                                                                                                                                                                                                                                                                                                                                                                                                                                                                                                                                                                                                                                                                                                                                                                                                                                                                                                                                                                                                                                                                                                                                                                                                                                                                                                                                                                                                                                                                                                                                                                             | He was taught by his father, a professional jazz drummer, to play drums from a very early age, but by the time he turned 16, his passion became the guitar. |

  

|                                                                                                                                                                                                                                                                                                                                                                                                                                                                                                                                                                                                                                                                                                                                                                                           |  |
|-------------------------------------------------------------------------------------------------------------------------------------------------------------------------------------------------------------------------------------------------------------------------------------------------------------------------------------------------------------------------------------------------------------------------------------------------------------------------------------------------------------------------------------------------------------------------------------------------------------------------------------------------------------------------------------------------------------------------------------------------------------------------------------------|--|
| Dharmajan Bolgatty, Biography                                                                                                                                                                                                                                                                                                                                                                                                                                                                                                                                                                                                                                                                                                                                                             |  |
| <p>Vishnu Unnikrishnan-starrer Nithyharitha Nayakan is all set for release on November 16. <b>The AR Binuraj directorial is Dharmajan Bolgatty's maiden production venture.</b> Dharmajan also has a starring role. Both Vishnu and Dharmajan have lent their voice to two of the songs.</p> <p>The rest of the cast comprises Indrans, Basil Joseph, Jafar Idukki, Bijukuttan, Sunil Sukadha, Saju Navodaya, AK Sajan, Sajan Pallurithi, Robin Machan, Muhammed Prasad, Manju Pillai, Sruthi Jayan, Anju Aravind and Gayathri.</p> <p>Binuraj directs from a script penend by Jayagopal. The editing is by Noufal Abdulla. Pavi K Pavan is handling the camera. Music is by Ranjin Raj. Dharmajan and Manu Thachett are bankrolling the film under the banner of Aadithya Creations.</p> |  |
| <p>After his full length role in Pappy appacha, his roles in Kattappanayile Rithwik Roshan, Aadu 1 &amp; aadu 2 established him as a comedy actor in Malayalam film Industry. He is also announced to become a playback singer. He is also a businessman and has established fish stores himself.</p>                                                                                                                                                                                                                                                                                                                                                                                                                                                                                     |  |
| He is also a film producer and produced a film named Nithyharitha Nayakan.                                                                                                                                                                                                                                                                                                                                                                                                                                                                                                                                                                                                                                                                                                                |  |

Figure 1: Additional example instances from the WIKICITE dataset. The topic is in red, reference document in yellow, context in green, and cloze in blue. Relevant reference document information in bold.

|                                                                                                                                                                                                                                                                                                                                                                                                                                                                                                                                                                                                                                                                                                                                                                                                                                                                                                                                                                                                                                                                                                                                                                                                                                                                                                                                                                                                                                                                                                                                                                                                                                                                                                                                                                                                                                                                                                                                                                                                                                                                                                                                                                                                                                                                                                                                                                                                                                                                                                                                                                                                                                                                                                                                                                                                                                                                                                                                                                                                                                                                                                                                                                                                                                                                                                                                                                                                                                                                                                                                                                                                                                                                   |
|-------------------------------------------------------------------------------------------------------------------------------------------------------------------------------------------------------------------------------------------------------------------------------------------------------------------------------------------------------------------------------------------------------------------------------------------------------------------------------------------------------------------------------------------------------------------------------------------------------------------------------------------------------------------------------------------------------------------------------------------------------------------------------------------------------------------------------------------------------------------------------------------------------------------------------------------------------------------------------------------------------------------------------------------------------------------------------------------------------------------------------------------------------------------------------------------------------------------------------------------------------------------------------------------------------------------------------------------------------------------------------------------------------------------------------------------------------------------------------------------------------------------------------------------------------------------------------------------------------------------------------------------------------------------------------------------------------------------------------------------------------------------------------------------------------------------------------------------------------------------------------------------------------------------------------------------------------------------------------------------------------------------------------------------------------------------------------------------------------------------------------------------------------------------------------------------------------------------------------------------------------------------------------------------------------------------------------------------------------------------------------------------------------------------------------------------------------------------------------------------------------------------------------------------------------------------------------------------------------------------------------------------------------------------------------------------------------------------------------------------------------------------------------------------------------------------------------------------------------------------------------------------------------------------------------------------------------------------------------------------------------------------------------------------------------------------------------------------------------------------------------------------------------------------------------------------------------------------------------------------------------------------------------------------------------------------------------------------------------------------------------------------------------------------------------------------------------------------------------------------------------------------------------------------------------------------------------------------------------------------------------------------------------------------|
| Dustin Fowler, Career, New York Yankees                                                                                                                                                                                                                                                                                                                                                                                                                                                                                                                                                                                                                                                                                                                                                                                                                                                                                                                                                                                                                                                                                                                                                                                                                                                                                                                                                                                                                                                                                                                                                                                                                                                                                                                                                                                                                                                                                                                                                                                                                                                                                                                                                                                                                                                                                                                                                                                                                                                                                                                                                                                                                                                                                                                                                                                                                                                                                                                                                                                                                                                                                                                                                                                                                                                                                                                                                                                                                                                                                                                                                                                                                           |
| <p>CHICAGO -- Joe Girardi stood near Dustin Fowler with his hands covering his face. The manager was absolutely gutted, heartbroken as Fowler sat on the ground, waiting for a cart to take him off the field. Fowler, a 22-year-old prospect who was selected by the Yankees in the 18th round of the 2013 MLB Draft, was making his MLB debut on Thursday night, living out his childhood dream. But with two outs in the bottom of the first inning, disaster struck. Fowler hustled to try to catch a foul ball off the bat of White Sox first baseman Jose Abreu down the right-field line. He collided with the short-wall, and his right leg slammed into it as he nearly plunged into the stands. It all happened so fast. Soon, Fowler was down and Girardi and trainer Steve Donohue were quickly out to check on him. His teammates surrounded him. Aaron Judge looked sick from the dugout. It was bad. A brace was placed on Fowler's right leg, and soon he was being picked up and carted off the field to applause. The Yankees eventually announced that Fowler had an open rupture of the right patella tendon in his right knee, and underwent surgery at Rush University Medical Center in Chicago. Surely, it is season-ending. Dustin Fowler leaves on a cart after crashing into right field wall. (Nam Y. Huh/AP) The whole scene was awful. <b>Fowler would've led off the second and had his first career at-bat.</b> He played but didn't bat in his MLB debut -- exactly 112 years to the day that Moonlight Graham did the same (June 29, 1905). Fowler had absolutely hit the cover off the ball -- both during the spring for New York and during the season for Triple-A Scranton. He displayed power. He displayed an ability to drive in runs. He was a gamer. The front office always raved about his makeup. "I'm overwhelmed right now," Fowler had said a few hours earlier in the Yankees' clubhouse. "I'm very excited, glad to be here." His promotion had caught him by surprise. But the Yankees have been decimated by injuries of late, leading to the promotions of fellow RailRiders Miguel Andujar (sent down to Triple-A on Thursday) and Fowler's close friend, Tyler Wade, in recent days. Clint Frazier could be the next Baby Bomber on his way up as a result of yet another injury -- this one to Fowler. Frazier has been a lightning rod for criticism -- much of it self-inflicted -- but is this the right time? Is he mature enough? And from a baseball perspective, do the Yankees want to bring him up if he isn't going to play every day? Sending our thoughts to Dustin Fowler of the @Yankees who left tonight's game following a collision with the right field foul wall.-- Chicago White Sox (@whitesox) June 30, 2017 After all, they already have superstar Aaron Judge and veterans Jacoby Ellsbury and Brett Gardner. Is he ready? Outfield prospect Jake Cave could be another option. Or perhaps the Yankees decide to bring Andujar back. They just designated Mason Williams for assignment. On Wednesday night, Fowler had been pulled from Triple-A Scranton's lineup. His mind raced. What's going on? Am I being called up? Am I being traded? He soon learned he was needed in Chicago. He flew from Syracuse to Chicago on Thursday afternoon, and didn't arrive until 4:30 p.m. CT. as typical traffic on I-90 from O'Hare International Airport halted his commute. He then had to wait out a 2-hour, 50-minute rain delay. And shortly after that, an awful injury. This wasn't how Dustin Fowler's career was supposed to start. And you can't help but feel for him.</p> |
| <p>Fowler made his major league debut on June 29, 2017, after a nearly three-hour rain delay, with the Yankees facing the Chicago White Sox on the road. During the first inning, he ran into a rail while chasing a fly ball, hitting his knee on a sharp edge of an electrical box. He collapsed to the ground and was carted off the field, before being diagnosed with an open rupture of the right patellar tendon. He was ruled out for the season. He underwent surgery that night at Rush University Medical Center.</p>                                                                                                                                                                                                                                                                                                                                                                                                                                                                                                                                                                                                                                                                                                                                                                                                                                                                                                                                                                                                                                                                                                                                                                                                                                                                                                                                                                                                                                                                                                                                                                                                                                                                                                                                                                                                                                                                                                                                                                                                                                                                                                                                                                                                                                                                                                                                                                                                                                                                                                                                                                                                                                                                                                                                                                                                                                                                                                                                                                                                                                                                                                                                  |
| <p>Fowler would have led off the next inning for his first major league plate appearance</p>                                                                                                                                                                                                                                                                                                                                                                                                                                                                                                                                                                                                                                                                                                                                                                                                                                                                                                                                                                                                                                                                                                                                                                                                                                                                                                                                                                                                                                                                                                                                                                                                                                                                                                                                                                                                                                                                                                                                                                                                                                                                                                                                                                                                                                                                                                                                                                                                                                                                                                                                                                                                                                                                                                                                                                                                                                                                                                                                                                                                                                                                                                                                                                                                                                                                                                                                                                                                                                                                                                                                                                      |

Figure 2: Additional example instances from the WIKICITE dataset. The topic is in red, reference document in yellow, context in green, and cloze in blue. Relevant reference document information in bold.

|                                                                                                                                                                                                                                                                                                                                                                                                                                                                                                                                                                                                                                                                                                                                                                                                                                                                                                                                                                                                                                                                                                                                                                                                                                                                                                                                                                                                                                                                                                                                                                                                                                                                                                                                                                                                                                                                                                                                                                                                                                                                                                                                                                                                                                                                                                                                                                                                                                                                                                                                                                                                                                                                                                                                                                                                                                                                                                                                                                                                                                                                                                                                                                                                                                                                                                                                                                                                                                                                                                                                                                                                                                                                                                                                                                                                                                                                                                                                                                                                                                                                                                                                              |                     |
|----------------------------------------------------------------------------------------------------------------------------------------------------------------------------------------------------------------------------------------------------------------------------------------------------------------------------------------------------------------------------------------------------------------------------------------------------------------------------------------------------------------------------------------------------------------------------------------------------------------------------------------------------------------------------------------------------------------------------------------------------------------------------------------------------------------------------------------------------------------------------------------------------------------------------------------------------------------------------------------------------------------------------------------------------------------------------------------------------------------------------------------------------------------------------------------------------------------------------------------------------------------------------------------------------------------------------------------------------------------------------------------------------------------------------------------------------------------------------------------------------------------------------------------------------------------------------------------------------------------------------------------------------------------------------------------------------------------------------------------------------------------------------------------------------------------------------------------------------------------------------------------------------------------------------------------------------------------------------------------------------------------------------------------------------------------------------------------------------------------------------------------------------------------------------------------------------------------------------------------------------------------------------------------------------------------------------------------------------------------------------------------------------------------------------------------------------------------------------------------------------------------------------------------------------------------------------------------------------------------------------------------------------------------------------------------------------------------------------------------------------------------------------------------------------------------------------------------------------------------------------------------------------------------------------------------------------------------------------------------------------------------------------------------------------------------------------------------------------------------------------------------------------------------------------------------------------------------------------------------------------------------------------------------------------------------------------------------------------------------------------------------------------------------------------------------------------------------------------------------------------------------------------------------------------------------------------------------------------------------------------------------------------------------------------------------------------------------------------------------------------------------------------------------------------------------------------------------------------------------------------------------------------------------------------------------------------------------------------------------------------------------------------------------------------------------------------------------------------------------------------------------------|---------------------|
| Caitlin Beevers, Refereeing career                                                                                                                                                                                                                                                                                                                                                                                                                                                                                                                                                                                                                                                                                                                                                                                                                                                                                                                                                                                                                                                                                                                                                                                                                                                                                                                                                                                                                                                                                                                                                                                                                                                                                                                                                                                                                                                                                                                                                                                                                                                                                                                                                                                                                                                                                                                                                                                                                                                                                                                                                                                                                                                                                                                                                                                                                                                                                                                                                                                                                                                                                                                                                                                                                                                                                                                                                                                                                                                                                                                                                                                                                                                                                                                                                                                                                                                                                                                                                                                                                                                                                                           |                     |
| <p>Local rugby player Caitlin Beevers has certainly had a week to remember - scoring a try last Saturday as she won the Women's Challenge Cup, and learning that she will officiate in a fortnight's time at Wembley.</p> <p>At just 16 years of age, the St John Fisher pupil was part of the Leeds Rhinos side that defeated Castleford Tigers 20-14 to win the trophy in Warrington, and she said the experience was "absolutely amazing".</p> <p>"It was great," Caitlin said. "This is my first season at open age so I'm privileged to play a final as big as that, and it was amazing to experience that with all my team-mates."</p> <p>"She described the elation of scoring a try in such a big game, saying that "it was absolutely amazing getting everyone to run and jump on you with excitement."</p> <p>She added: "But in the end I wouldn't have got there without my teammates getting me up the field and giving me the opportunity to do things like that."</p> <p>"It was a very tough game and we knew Cas were going to bring it all out as they always do, but I think we worked hard enough in the end."</p> <p>She started playing rugby at the age of six, and says that she never expected to get so far and so quickly.</p> <p>"I played at Birstall Victoria boys' under 7s. As soon as I got to under 12s to play for a girls' team, that's when it started really."</p> <p>"I got into the 19s [at Leeds] and I was the youngest there, so I was absolutely over the moon with the opportunity I was given."</p> <p>"I never expected to get into the first team, and it was just an amazing feeling that in my first year in open age I got that big an opportunity coming my way, and I was one of the first three to be chosen."</p> <p>Caitlin says her natural position is at full-back, but that she has been asked to play in a variety of positions with the Rhinos this year.</p> <p>"I've been moved about quite a lot! I've had hooker, winger, centre, loose forward, full-back. I never came into the team expecting to play full-back as we've got such an amazing one, Charlotte Booth, but I'm fine with any position I get put at."</p> <p>"At the end of the day I'm lucky to get in the team, and if they think that might be the best position for me then I'll take it."</p> <p>"She is very encouraged by the progress that women's rugby league is making and she said that is the case at youth levels as well."</p> <p>"We've got loads of girls teams coming through now," she said. "When I first started, as you can imagine it was very small, and I only found one girl playing in a boys' team like I did."</p> <p>But now you see girls' games and you see them playing from a young age and it's amazing to see them starting so young, and I hope that it does become a lot bigger than it is already."</p> <p><b>"Winning the Challenge Cup wasn't the only highlight of her week though - she also learnt that she will appear at Wembley, refereeing the Year 7 National Schools Final."</b></p> <p>She said that she was "absolutely over the moon" to be chosen, although she waited a few days to share the news.</p> <p>"I found out last Thursday I think, but I decided to wait until after the final to promote it as I wanted to focus on that and then focus on the refereeing."</p> <p>Caitlin explained how she first got into refereeing at the age of 13.</p> <p>"Originally I just wanted to do it to help out, because I took a gap year from playing and I wanted to stay in the game and still have a great deal to do with it."</p> <p>"So I decided to go into refereeing, not expecting to do it that much but now I do it every weekend and I love it."</p> <p>"I do community games for my society, the NCL every week, under 19s, academy games, and I got my first reserves the other week."</p> <p>She had already officiated a national final for Year 8 girls, <b>but will now become the first female to referee any rugby league match at Wembley Stadium on 25th August, in the curtain-raiser to the men's Challenge Cup final.</b></p> |                     |
| Beevers started refereeing aged 13 and is a member of Dewsbury & Batley Referees Society.                                                                                                                                                                                                                                                                                                                                                                                                                                                                                                                                                                                                                                                                                                                                                                                                                                                                                                                                                                                                                                                                                                                                                                                                                                                                                                                                                                                                                                                                                                                                                                                                                                                                                                                                                                                                                                                                                                                                                                                                                                                                                                                                                                                                                                                                                                                                                                                                                                                                                                                                                                                                                                                                                                                                                                                                                                                                                                                                                                                                                                                                                                                                                                                                                                                                                                                                                                                                                                                                                                                                                                                                                                                                                                                                                                                                                                                                                                                                                                                                                                                    | In 2018 she         |
| became the first women to referee a rugby league game at Wembley Stadium when she refereed the Year 7 Boys National Schools Final (the curtain raiser to the Challenge Cup Final).                                                                                                                                                                                                                                                                                                                                                                                                                                                                                                                                                                                                                                                                                                                                                                                                                                                                                                                                                                                                                                                                                                                                                                                                                                                                                                                                                                                                                                                                                                                                                                                                                                                                                                                                                                                                                                                                                                                                                                                                                                                                                                                                                                                                                                                                                                                                                                                                                                                                                                                                                                                                                                                                                                                                                                                                                                                                                                                                                                                                                                                                                                                                                                                                                                                                                                                                                                                                                                                                                                                                                                                                                                                                                                                                                                                                                                                                                                                                                           | refereed the Year 7 |

Figure 3: Additional example instances from the WIKICITE dataset. The topic is in red, reference document in yellow, context in green, and cloze in blue. Relevant reference document information in bold.
