# Supplementary material
Source: ML conference proceedings conference paper supplement (https://aclanthology.org/D19-1386)
Supplement: Attachment [file D19-1386.Attachment.zip]

Archive with 3 entries (2 files):
- summary-cloze-appendix.pdf
- __MACOSX/
- __MACOSX/._summary-cloze-appendix.pdf
